# Supplementary material for: De novo design of immunoglobulin-like domains
Source: PubMed Central journal article supplement (PMC9530121; doi:10.1038/s41467-022-33004-6), 2022-10-03
Supplement: 41467_2022_33004_MOESM3_ESM.pdf [file 41467_2022_33004_MOESM3_ESM.pdf]

## **Description of Additional supplementary files**

**File name:** Supplementary Data 1

**Description:** Experimentally tested designed protein structures.
